# Supplementary material for: Implementing Zero Impact Factories in Volkswagen’s Global Automotive Manufacturing System: A Discussion of Opportunities and Challenges from Integrating Current Science into Strategic Management
Source: MDPI journal article supplement (doi:10.3390/su16073011), 2024-04-04
Supplement: s1 [file s1]

Archive with 2 entries (2 files):
- Supplementary S1 - Additional information (zero impact factory).pdf
- Supplementary S2 - Site Checklist.pdf
