# Supplementary material for: Implementing Zero Impact Factories in Volkswagen’s Global Automotive Manufacturing System: A Discussion of Opportunities and Challenges from Integrating Current Science into Strategic Management
Source: MDPI journal article supplement (doi:10.3390/su16073011), 2024-04-04
Supplement: s1 [file s1 › Supplementary S1 - Additional information (zero impact factory).pdf]

### Supplementary S1.1: Relevant elements of strategic environmental sustainability for zero impact transformations

| Strategy element         | Relevant aspect                                                                 | Description                                                                                                        | Source                       | Relevant management activities in automotive manufacturing                                    |
|--------------------------|---------------------------------------------------------------------------------|--------------------------------------------------------------------------------------------------------------------|------------------------------|-----------------------------------------------------------------------------------------------|
| <b>Strategic context</b> | Absolute sustainability                                                         | Human activities respect the carrying capacities of ecosystems                                                     | [1]                          | Identification of requirements to establish an environmentally effective factory system       |
|                          | Sustainable Development Goals (UN SDGs)                                         | Global sustainable development agenda                                                                              | [2]<br>[3]                   | Implementation of the manufacturing requirements in UN SDGs number 8, 9, 12                   |
|                          | Legislation and regulation (European Union)                                     | EU Climate and Energy Framework<br>EU Circular Economy Action Plan<br>EU Zero Pollution Action Plan<br>EU Taxonomy | [4]<br>[5]<br>[5],[6]<br>[7] | Strategic and technical adaptation of existing factories for environmental compliance         |
|                          | Finance and reporting                                                           | Requirements of sustainability reporting schemes and finance markets (credit lending)                              | [8], [9]                     | Development of a holistic environmental data management                                       |
|                          | Stakeholder demands                                                             | Demands of e.g. employees, local community, governmental and non-governmental organizations and suppliers          | [10], [11]                   | Alignment of organizational processes with societal demands                                   |
|                          | Upstream and downstream-processes                                               | Availability of energy, water and resources as well as waste water and waste infrastructure                        | [12]                         | Provision of technical and economic resources to develop sustainable factory systems          |
| <b>Strategic process</b> | Absolute goal setting – PB “climate change” (increasing to high risk)           | Climate change mitigation in accordance with the Paris Agreement                                                   | [13], [14]                   | Definition of goals which include effective transition to carbon-free factories               |
|                          | Absolute goal setting – PB “fresh water” (blue + green water = increasing risk) | Avoidance of further interference with the water cycle                                                             | [15]                         | Definition of goals which impact avoidance of factories in water-scarce regions               |
|                          | Absolute goal-setting – PB “novel entities” (increasing to high risk)           | Zero Pollution Action Plan of the European Union                                                                   | [6], [16]                    | Definition of goals which include avoidance of anthropogenic substance emissions of factories |
|                          | Absolute goal setting - PB land system change (increasing risk)                 | Circular material flows and zero waste                                                                             | [17], [18]                   | Definition of goals which aim to minimize use of natural resources through factories          |

|                          |                                                  |                                                                                                                            |                        |                                                                                                                      |
|--------------------------|--------------------------------------------------|----------------------------------------------------------------------------------------------------------------------------|------------------------|----------------------------------------------------------------------------------------------------------------------|
|                          | Transformative process – progress measurement    | Measurability based on defined environmental aspects and accepted assessment methods                                       | [19]                   | Implementation of impact-based methods to evaluate the factory transformation                                        |
|                          | Transformative process – reporting               | Environmental reporting to communicate the organizational progress                                                         | [20]                   | Implementation of internal and external reporting processes for management, legislative, rating and ranking reports. |
|                          | Transformative process – innovation and learning | Innovation and learning processes for sustainability (based on system innovation, cooperation and stakeholder integration) | [21]                   | Implementation of innovation and learning processes within the factory to develop zero impact solutions              |
| <b>Strategic content</b> | Factory system - energy subsystem                | Use of renewable energy                                                                                                    | [22]                   | Realization of a carbon-free factory                                                                                 |
|                          | Factory system - material subsystem              | Circular use of technical materials, use of biogenic materials, waste avoidance                                            | [12]                   | Utilization of secondary materials and process organization for recycling                                            |
|                          | Factory system - water subsystem                 | Circular use of water and use of rainwater                                                                                 | [23]                   | Minimal fresh water usage and maximum water recycling                                                                |
|                          | Factory system - production subsystem            | Avoidance of emissions                                                                                                     | [24]                   | Implementation of low-to-zero emission technologies in production                                                    |
|                          | Environmental compliance                         | Effective environmental compliance management                                                                              | [25]                   | Identification of future legal requirements for factories                                                            |
|                          | Environmental management                         | Systems-based environmental management                                                                                     | [26]                   | Operationalization of strategic goals, processes, reporting, innovation and learning                                 |
|                          | Factory architecture                             | Eco-positive design and building appearance                                                                                | [22], [27], [28], [29] | Conceptualization of ecological factory                                                                              |
|                          | Biodiversity management                          | Biodiversity-integrated industrial project management                                                                      | [30]<br>[31]           | Integration of biodiversity management in environmental management processes                                         |
|                          | Factory planning                                 | Life-cycle oriented factory planning                                                                                       | [32]                   | Integration of life-cycle based evaluations in factory planning                                                      |
|                          | Digitalization of resource flows                 | Cyber-physical production management                                                                                       | [33]                   | Optimization of energy and resource flows within the factory                                                         |
|                          | Emission management                              | Zero emissions in water, soil, air and factory ambience                                                                    | [6], [34]              | Implementation of low-to-zero technologies in production                                                             |

|  |                                   |                                                       |      |                                                                             |
|--|-----------------------------------|-------------------------------------------------------|------|-----------------------------------------------------------------------------|
|  | Environmental engineering         | Effective prevention and contamination rehabilitation | [35] | Implementation of technical standards for prevention and rehabilitation     |
|  | Transport and mobility management | Sustainable transport and mobility                    | [36] | Implementation of sustainable logistics and transport choices for employees |

### Supplementary S1.2: Selected technical benchmark values from the Site Checklist for a zero impact factory

| Aspect of a zero impact factory | Technical aspect               | Benchmark value                                                                                                                                                                                    |
|---------------------------------|--------------------------------|----------------------------------------------------------------------------------------------------------------------------------------------------------------------------------------------------|
| Architecture and perception     | Roof / façade greening         | ≥ 50% of the building envelope (roof surfaces and external facades) is green                                                                                                                       |
|                                 | Natural lighting               | Natural lighting in ≥ 80% of the office space and in production areas where ecologically sensible                                                                                                  |
| Digitalization                  | Energy and data management     | Measurement data of all (100%) energy- and environmentally-relevant facilities are analyzed and evaluated in a central IT landscape (e.g. cloud system or similar)                                 |
| Water                           | Fresh water                    | KPI fresh water ≤ 1.0 m <sup>3</sup> /vehicle for vehicle production sites or reduction of 50% per production unit compared to the base year for component sites                                   |
|                                 | Waste water (direct discharge) | Pollutant concentrations are adhered to: Cl <sup>-</sup> : 500 mg/l, SO <sub>4</sub> <sup>2-</sup> : 500 mg/l, Ni: 0.05 mg/l, Zn: 0.05 mg/l, Mn: 0.05 mg/l, COD: 50 mg/l, conductivity: 1500 µS/cm |
| Energy                          | Heat                           | Efficient heat supply: annual efficiency ≥ 90 %                                                                                                                                                    |
|                                 | Cooling                        | TEPF > 6.5 for compression chillers, TEPF > 0.7 for absorption chillers (TEPF=Total Energy Performance Factor)                                                                                     |
|                                 | Compressed air                 | Efficient compressed air supply: generation efficiency ≤ 0.12 kWhel/Nm <sup>3</sup>                                                                                                                |
|                                 | LED lamps                      | The proportion of lighting provided by LED lamps is ≥ 90% of the usable area of the site                                                                                                           |
|                                 | Paint shop                     | Energy-efficient paint shop (total energy) ≤ 5 kWh / m <sup>2</sup> painted surface                                                                                                                |
|                                 | Vehicle production             | Energy-efficient vehicle production (electrical energy) ≤ 0.4 MWhel / vehicle                                                                                                                      |
|                                 | Renewable energy               | 100% renewable energies in external electricity supply                                                                                                                                             |
|                                 | Own generation                 | The site covers ≥ 10% of its heating needs and ≥ 10% of its electricity needs from renewable sources                                                                                               |
|                                 | CO2 neutrality                 | The factory is operated in a CO2e-neutral manner (including neutralization of CO2e emissions)                                                                                                      |
| Material                        | Plastic waste                  | ≥ 60% by weight of the plastic waste is sorted separately according to composition and material                                                                                                    |
|                                 | Incineration                   | ≤ 10% by weight of all production-specific recycling waste is thermally recovered                                                                                                                  |
|                                 | Disposal                       | ≤ 1% by weight of all production-related waste is for disposal                                                                                                                                     |
|                                 | Recycling                      | ≥ 99% by weight of all production-specific waste is recycled (ultimate goal)                                                                                                                       |
| Biodiversity                    | Biodiversity-tool              | The result (KPI) from the application of the biodiversity site assessment tool is ≥ 50%                                                                                                            |
| Pollutants                      | Exhaust air (paint shop)       | Regenerative / thermal afterburners - limit values: C <sub>tot</sub> 10 mg/Nm <sup>3</sup> , CO 100 mg/Nm <sup>3</sup> , NOx 100 mg/Nm <sup>3</sup>                                                |
|                                 | Dust emissions                 | Captured dust emissions (total dust) from the paint shop are ≤ 1 mg/Nm <sup>3</sup>                                                                                                                |
|                                 | VOC emissions                  | VOC emissions from the paint shops are ≤ 8 g/m <sup>2</sup> body surface                                                                                                                           |
| Mobility                        | Employees                      | ≥ 90% of employees come to work CO2-neutral                                                                                                                                                        |
|                                 | Freight transport              | Logistics operations are 100% CO2-neutral                                                                                                                                                          |

**Supplementary S1.3.: Summary of strategic challenges and opportunities plus identified solutions by the strategic management**

| <b>Strategy element</b>                              | <b>Identified Challenge</b>                                                      | <b>Opportunity</b>                                                                                                   | <b>Solution through the strategic management</b>                                                                  |
|------------------------------------------------------|----------------------------------------------------------------------------------|----------------------------------------------------------------------------------------------------------------------|-------------------------------------------------------------------------------------------------------------------|
| <b>Overall strategy (including vision and goals)</b> | Build up knowledge among decision-makers in top-management                       | Liability of the strategy                                                                                            | Informational meetings and workshops with decision-makers                                                         |
|                                                      | General strategic commitment by the company for the “zero impact”-transformation | Positive customer awareness, resource security and science-based strategic communication                             | Information on sustainability opportunities, stakeholder-based knowledge management                               |
|                                                      | Coordination of brands and generation of a long-term strategic commitment        | Definition of the goals and the linear long-term target path until 2050                                              | Facilitation of a top-down strategy implementation process supported with a top management decision               |
| <b>Strategy development</b>                          | Interface management on Group-, brand- and factory-level                         | Structured information flow within the company                                                                       | Implementation of management councils and working groups                                                          |
|                                                      | Knowledge management                                                             | Strategy alignment with current scientific findings                                                                  | Facilitation of sub-projects and definition of project managers for structured content development.               |
|                                                      | Quality management                                                               | Acceptance of external reviewers and stakeholders                                                                    | Installation of review processes with internal revision, scientific review council and auditing company           |
|                                                      | Adaptation management                                                            | Integration of novel topics into the strategy                                                                        | Provision of capacities for new strategic projects                                                                |
| <b>Prototype of a zero impact factory</b>            | Implementability of the vision                                                   | Visual and real-life representation of the strategic vision                                                          | Collection of best practice measures within the Group to show Implementability of the vision                      |
|                                                      | Acquiring and allocating financial resources for the transformation              | Acceptance of the top management through highlighting the effectiveness of implemented measures                      | Priorization of transformative topics with regard to the impact reduction                                         |
| <b>Method development</b>                            | Translation of PBs into business                                                 | Impact-based approach for strategic steering                                                                         | Definition of “zero impact”-thresholds in accordance with scientific partners                                     |
|                                                      | Benchmark values due to missing scientific evidence                              | Detailed factory analysis for technical and procedural optimization and progress documentation in auditing processes | Facilitation of a significant amount of expert knowledge in working groups and in iterative improvement processes |

|                             |                                                                                                                 |                                                                                                                                            |                                                                                                                                  |
|-----------------------------|-----------------------------------------------------------------------------------------------------------------|--------------------------------------------------------------------------------------------------------------------------------------------|----------------------------------------------------------------------------------------------------------------------------------|
|                             | Strategic and method-based steering                                                                             | A successful operationalization of the “zero impact”-transformation process                                                                | Data and information management supported by tools and internal databases                                                        |
|                             | Internal and external acceptance                                                                                | Internal acceptance contributes to successful strategy implementation, external acceptance contributes to positive company image           | Knowledge transfer workshops (internal) and publication in official company reporting (external)                                 |
| <b>Strategic management</b> | Strategy process management and strategy steering including stakeholder management, reporting and communication | Successful strategy implementation through a clear organizational structure and a high level of acceptance among all internal stakeholders | Regular management council meetings with structured agendas, clear strategy organizations on Group-, brand and factory-level and |

## References

1. Hauschild, M.Z.; Kara, S.; Røpke, I. Absolute sustainability: Challenges to life cycle engineering. *CIRP Annals* **2020**, *69*, 533–553, doi:10.1016/j.cirp.2020.05.004.
2. UN. Transforming our world: the 2030 Agenda for Sustainable Development. Available online: <https://sustainabledevelopment.un.org/post2015/transformingourworld> (accessed on 6 May 2020).
3. Sachs, J.D.; Schmidt-Traub, G.; Mazzucato, M.; Messner, D.; Nakicenovic, N.; Rockström, J. Six Transformations to achieve the Sustainable Development Goals. *Nature Sustainability* **2019**, doi:10.1038/s41893-019-0352-9.
4. EU. 2030 climate & energy framework. Available online: [https://ec.europa.eu/clima/policies/strategies/2030\\_en](https://ec.europa.eu/clima/policies/strategies/2030_en) (accessed on 6 May 2020).
5. European Commission. Circular economy action plan: The EU's new circular action plan paves the way for a cleaner and more competitive Europe. Available online: [https://ec.europa.eu/environment/strategy/circular-economy-action-plan\\_en](https://ec.europa.eu/environment/strategy/circular-economy-action-plan_en) (accessed on 27 May 2022).
6. European Commission. Zero pollution action plan. Available online: [https://ec.europa.eu/environment/strategy/zero-pollution-action-plan\\_en](https://ec.europa.eu/environment/strategy/zero-pollution-action-plan_en) (accessed on 20 April 2022).
7. European Commission. EU taxonomy for sustainable activities: What the EU is doing to create an EU-wide classification system for sustainable activities. Available online: [https://finance.ec.europa.eu/sustainable-finance/tools-and-standards/eu-taxonomy-sustainable-activities\\_en](https://finance.ec.europa.eu/sustainable-finance/tools-and-standards/eu-taxonomy-sustainable-activities_en).
8. GRI. 25 years of empowering sustainable decisions. Available online: <https://www.globalreporting.org/>.
9. Wendt, K. Positive Impact Investing: A New Paradigm for Future Oriented Leadership and Innovative Corporate Culture. In *Positive Impact Investing: A Sustainable Bridge Between Strategy, Innovation, Change and Learning*; Wendt, K., Ed.; Springer International Publishing: Cham, 2018; pp 1–26, ISBN 978-3-319-10118-7.
10. Sutherland, J.W.; Richter, J.S.; Hutchins, M.; Dornfeld, D.; Dzombak, R.; Mangold, J.; Robinson, J.; Hauschild, M. Z.; Bonou, A.; Schönsleben, P.; Friemann, F. The role of manufacturing in affecting the social dimension of sustainability. *CIRP Annals - Manufacturing Technology* **2016**, 689–712.
11. Goedkoop, M.; Beer, I. de; Indrane, D. Product Social Impact Assessment: Handbook 2018: Amersfort **2018**.
12. World Economic Forum; Ellen MacArthur Foundation; McKinsey & Company. Towards the Circular Economy: Accelerating the Scale-Up Across Global Supply Chains.: World Economic Forum, Ellen MacArthur Foundation & McKinsey & Company Geneva, Switzerland **2014**.
13. Vieira, L.C.; Longo, M.; Mura, M. Are the European manufacturing and energy sectors on track for achieving net-zero emissions in 2050? An empirical analysis. *Energy Policy* **2021**, *156*, 112464, doi:10.1016/j.enpol.2021.112464.
14. Science Based Targets Initiative. About the Science Based Targets Initiative: Science Based Targets Initiative. Available online: <https://sciencebasedtargets.org/about-the-science-based-targets-initiative/> (accessed on 6 May 2020).
15. Richardson, K.; Steffen, W.; Lucht, W.; Bendtsen, J.; Cornell, S.E.; Donges, J.F.; Drüke, M.; Fetzer, I.; Bala, G.; Bloh, W. von; et al. Earth beyond six of nine planetary boundaries. *Science Advances* **2023**, *9*, eadh2458, doi:10.1126/sciadv.adh2458.
16. Wang, Z.; Hellweg, S. First Steps Toward Sustainable Circular Uses of Chemicals: Advancing the Assessment and Management Paradigm. *ACS Sustainable Chem. Eng.* **2021**, *9*, 6939–6951, doi:10.1021/acssuschemeng.1c00243.
17. Geissdoerfer, M.; Savaget, P.; Bocken, N.M.P.; Hultink, E.J. The Circular Economy – A new sustainability paradigm? *Journal of Cleaner Production* **2017**, *143*, 757–768, doi:10.1016/j.jclepro.2016.12.048.
18. Singh, S.; Ramakrishna, S.; Gupta, M.K. Towards zero waste manufacturing: A multidisciplinary review. *Achieving Low/no Fossil-carbon Economies based upon the Essential Transformations to Support them* **2017**, *168*, 1230–1243, doi:10.1016/j.jclepro.2017.09.108.

19. Gernuks, M.; Buchgeister, J.; Schebek, L. Assessment of environmental aspects and determination of environmental targets within environmental management systems (EMS) – development of a procedure for Volkswagen. *The Automobile Industry & Sustainability* **2007**, *15*, 1063–1075, doi:10.1016/j.jclepro.2006.06.003.
20. Baumgartner, R.J.; Rauter, R. Strategic perspectives of corporate sustainability management to develop a sustainable organization. *Journal of Cleaner Production* **2017**, *140*, 81–92, doi:10.1016/j.jclepro.2016.04.146.
21. Adams, R.; Jeanrenaud, S.; Bessant, J.; Denyer, D.; Overby, P. Sustainability-oriented Innovation: A Systematic Review. *International Journal of Management Reviews* **2016**, *18*, 180–205, doi:10.1111/ijmr.12068.
22. Herrmann, C.; Schmidt, C.; Kurle, D.; Blume, S.; Thiede, S. Sustainability in manufacturing and factories of the future. *Int. J. of Precis. Eng. and Manuf.-Green Tech.* **2014**, *1*, 283–292, doi:10.1007/s40684-014-0034-z.
23. Joustra, C.M.; Yeh, D.H. Framework for net-zero and net-positive building water cycle management. *Building Research & Information* **2014**, *43*, 121–132, doi:10.1080/09613218.2015.961002.
24. Despeisse, M.; Ball, P.D.; Evans, S.; Levers, A. Industrial ecology at factory level – a conceptual model. *Journal of Cleaner Production* **2012**, *31*, 30–39, doi:10.1016/j.jclepro.2012.02.027.
25. *A continuous risk estimation approach for corporate environmental compliance management*. 2015 IEEE 15th International Conference on Environment and Electrical Engineering (EEEIC); Thimm, H., Ed. 2015 IEEE 15th International Conference on Environment and Electrical Engineering (EEEIC), 2015.
26. Welford, R. *Corporate Environmental Management 1*; Routledge, 2016, ISBN 9781315825120.
27. Birkeland, J.; Knight-Lenihan, S. Biodiversity offsetting and net positive design. *Journal of Urban Design* **2016**, *21*, 50–66, doi:10.1080/13574809.2015.1129891.
28. DGNB. Industriestandorte. Deutsche Gesellschaft für nachhaltiges Bauen e.V. (DGNB). Available online: <https://www.dgnb-system.de/de/quartiere/industriestandorte/index.php> (accessed on 2 December 2019).
29. Gebler, M. Konzept einer Positivfabrik. In *Planung und Gestaltung einer Positivfabrik als Beitrag für eine absolute Nachhaltigkeit*; Gebler, M., Ed.; Springer Fachmedien Wiesbaden: Wiesbaden, 2022; pp 99–211, ISBN 978-3-658-38976-5.
30. Bull, J.W.; Brownlie, S. The transition from No Net Loss to a Net Gain of biodiversity is far from trivial. *Oryx* **2017**, *51*, 53–59, doi:10.1017/S0030605315000861.
31. Aiama, D.; Edwards, S.; Bos, G.; Ekstrom, J.; Krueger, L.; Quétier, F.; Savy, C.; Semroc, B.; Sneary, M. No Net Loss and Net Positive Impact Approaches for Biodiversity: Exploring the potential application of these approaches in the commercial agriculture and forestry sectors. International Union for Conservation of Nature (IUCN), Switzerland **2015**.
32. Dér, A.; Hingst, L.; Nyhuis, P.; Herrmann, C. A review of frameworks, methods and models for the evaluation and engineering of factory life cycles. *Advances in Industrial and Manufacturing Engineering* **2022**, *4*, 100083, doi:10.1016/j.aime.2022.100083.
33. Thiede, S. Cyber Physical Production Systems and Their Role for Decarbonization of Industry. In *Intelligent Decarbonisation: Can Artificial Intelligence and Cyber-Physical Systems Help Achieve Climate Mitigation Targets?*; Inderwildi, O., Kraft, M., Eds.; Springer International Publishing: Cham, 2022; pp 75–86, ISBN 978-3-030-86215-2.
34. *Eco-efficiency – creating more value with less impact.*; WBCSD, Ed., 2000.
35. UBA. Current state and future prospects of remedial soil protection: German Federal Environmental Agency. Available online: <https://www.umweltbundesamt.de/publikationen/current-state-future-prospects-of-remedial-soil> (accessed on 17 January 2023).
36. Stiel, F.; Michel, T.; Teuteberg, F. Enhancing manufacturing and transportation decision support systems with LCA add-ins. *Special Volume: Improved resource efficiency and cascading utilisation of renewable materials* **2016**, *110*, 85–98, doi:10.1016/j.jclepro.2015.07.140.
